# Supplementary material for: Silk Fiber as the Support and Reductant for the Facile Synthesis of Ag–Fe3O4 Nanocomposites and Its Antibacterial Properties
Source: PubMed Central journal article supplement (PMC5456862; doi:10.3390/ma9070501), 2016-06-23
Supplement: materials-09-00501-s001.pdf [file materials-09-00501-s001.pdf]

# Supplementary Materials: Silk Fiber as the Support and Reductant for the Facile Synthesis of Ag-Fe<sub>3</sub>O<sub>4</sub> Nanocomposites and Its Antibacterial Properties

Xiaonan Liu, Guangfu Yin, Zao Yi and Tao Duan

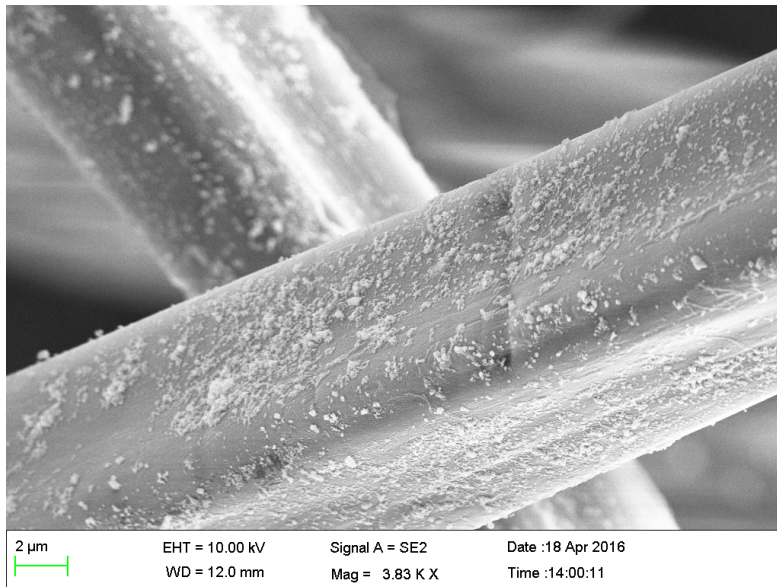

**Figure S1.** SEM of Ag-Fe<sub>3</sub>O<sub>4</sub>-Silk fiber (2#).
